# Supplementary material for: Slip-resistant footwear reduces slips among National Health Service workers in England: a randomised controlled trial
Source: HighWire-hosted journal article supplement (doi:10.1136/oemed-2020-106914), 2021-01-15
Supplement: oemed-2020-106914supp001_data_supplement.pdf [file oemed-2020-106914supp001_data_supplement.pdf]

**Slip-resistant footwear reduces slips among National Health Service workers in England: A randomised controlled trial**

**Supplementary 1 Characteristics of the participants**

**Supplementary 2 Response rates to post-randomisation messages**

**Supplementary 3 Data collected on the first slip reported by participants**

SSHeW supplementary material v4

**Supplementary 1 Characteristics of the participants**

| Characteristic                                                   | Intervention<br>(n=2275) | Control<br>(n=2278) | Total<br>(n=4553) |
|------------------------------------------------------------------|--------------------------|---------------------|-------------------|
| <b>Time spent on feet at work, n (%)</b>                         |                          |                     |                   |
| Most of the time                                                 | 1843 (81.0)              | 1829 (80.3)         | 3672 (80.7)       |
| Some of the time                                                 | 385 (16.9)               | 400 (17.6)          | 785 (17.2)        |
| A little of the time                                             | 11 (0.5)                 | 18 (0.8)            | 29 (0.6)          |
| Missing                                                          | 36 (1.6)                 | 31 (1.4)            | 67 (1.5)          |
| <b>Required to work in the community, n (%)</b>                  |                          |                     |                   |
| Yes                                                              | 552 (24.3)               | 554 (24.3)          | 1106 (24.3)       |
| No                                                               | 1688 (74.2)              | 1689 (74.1)         | 3377 (74.2)       |
| Missing                                                          | 35 (1.5)                 | 35 (1.5)            | 70 (1.5)          |
| <b>Have you had a fall at work in the past 12 months?, n (%)</b> |                          |                     |                   |
| Yes                                                              | 188 (8.3)                | 192 (8.4)           | 380 (8.3)         |
| No                                                               | 2039 (89.6)              | 2040 (89.6)         | 4079 (89.6)       |
| Don't know                                                       | 29 (1.3)                 | 31 (1.4)            | 60 (1.3)          |
| Missing                                                          | 19 (0.8)                 | 15 (0.7)            | 34 (0.7)          |
| <b>If yes, how many?</b>                                         |                          |                     |                   |
| Median (min, max)                                                | 1 (1, 52)                | 1 (1, 20)           | 1 (1, 52)         |
| <b>Have you suffered injury from any of these falls?, n (%)</b>  | 69 (36.9)                | 74 (39.5)           | 144 (38.2)        |

max, maximum; min, minimum; n, number; %, percentage

**Supplementary 2 Response rates to post-randomisation messages**

| Week post-randomization               | Intervention<br>(n=2275) | Control<br>(n=2278)     | Total<br>(n=4553)       |
|---------------------------------------|--------------------------|-------------------------|-------------------------|
|                                       | N received / N sent (%)  | N received / N sent (%) | N received / N sent (%) |
| 1                                     | 2109/2275 (92.7)         | 2112/2278 (92.7)        | 4221/4553 (92.7)        |
| 2                                     | 2117/2272 (93.2)         | 2101/2278 (92.2)        | 4218/4550 (92.7)        |
| 3                                     | 2079/2270 (91.6)         | 2094/2278 (91.9)        | 4173/4548 (91.8)        |
| 4                                     | 2052/2269 (90.4)         | 2075/2276 (91.2)        | 4127/4545 (90.8)        |
| 5                                     | 2063/2267 (91.0)         | 2068/2275 (90.9)        | 4131/4542 (91.0)        |
| 6                                     | 2033/2265 (89.8)         | 2047/2272 (90.1)        | 4080/4537 (89.9)        |
| 7                                     | 1967/2265 (86.8)         | 2055/2271 (90.5)        | 4022/4536 (88.7)        |
| 8                                     | 1963/2261 (86.8)         | 2028/2271 (89.3)        | 3991/4532 (88.1)        |
| 9                                     | 1962/2261 (86.8)         | 2034/2271 (89.6)        | 3996/4532 (88.2)        |
| 10                                    | 1936/2259 (85.7)         | 2012/2271 (88.6)        | 3948/4530 (87.2)        |
| 11                                    | 1948/2259 (86.2)         | 1996/2271 (87.9)        | 3944/4530 (87.1)        |
| 12                                    | 1926/2256 (85.4)         | 1988/2271 (87.5)        | 3914/4527 (86.5)        |
| 13                                    | 1921/2255 (85.2)         | 1996/2271 (87.9)        | 3917/4526 (86.5)        |
| 14                                    | 1924/2253 (85.4)         | 1985/2269 (87.5)        | 3909/4522 (86.4)        |
| Response to at least one text message | 2254/2275 (99.1%)        | 2240/2278 (98.3%)       | 4494/4553 (98.7%)       |
| Response to all 14 text messages      | 1289/2275 (56.7%)        | 1400/2278 (61.5%)       | 2689/4553 (59.1%)       |

N, number, %, percentage

SSHeW supplementary material v4

**Supplementary 3 Data collected on the first slip reported by participants**

| Characteristic                                             | Intervention<br>(n=497) | Control<br>(n=662) | Total<br>(n=1159) |
|------------------------------------------------------------|-------------------------|--------------------|-------------------|
| <b>Hours worked in week of first slip</b>                  |                         |                    |                   |
| Mean (SD)                                                  | 35.7 (7.8)              | 35.6 (7.0)         | 35.6 (7.4)        |
| Median (min, max)                                          | 37.5 (3.5, 75.0)        | 37.5 (5.0, 75.0)   | 37.5 (3.5, 75.0)  |
| <b>Type of slip, n (%)</b>                                 |                         |                    |                   |
| Slip without falling (however minor)                       | 437 (87.9)              | 596 (90.0)         | 1033 (89.1)       |
| Slip and fall                                              | 12 (2.4)                | 23 (3.5)           | 35 (3.0)          |
| Missing                                                    | 48 (9.7)                | 43 (6.5)           | 91 (7.9)          |
| <b>Wearing trial shoes when slipped, n (%)</b>             |                         |                    |                   |
| Yes                                                        | 82 (16.5)               | -                  | -                 |
| No                                                         | 363 (73.0)              | -                  | -                 |
| Don't know                                                 | 3 (0.6)                 | -                  | -                 |
| Missing                                                    | 49 (9.9)                | -                  | -                 |
| <b>Location of slip, n (%)</b>                             |                         |                    |                   |
| On a ward or other clinical area in a hospital             | 479 (96.4)              | 644 (97.3)         | 1123 (96.9)       |
| In a non-clinical area in a hospital e.g. office, corridor | 5 (1.0)                 | 3 (0.5)            | 8 (0.7)           |
| In a catering area where food is prepared or served        | 1 (0.2)                 | 0 (0.0)            | 1 (0.1)           |
| Outside                                                    | 4 (0.8)                 | 6 (0.9)            | 10 (0.9)          |
| Inside a patient's home                                    | 1 (0.2)                 | 0 (0.0)            | 1 (0.1)           |
| Other                                                      | 7 (1.4)                 | 9 (1.4)            | 16 (1.4)          |
| Missing                                                    | 0 (0.0)                 | 0 (0.0)            | 0 (0.0)           |
| <b>Slipped on..., n (%)</b>                                |                         |                    |                   |
| Smooth surface                                             | 341 (68.6)              | 532 (80.4)         | 873 (75.3)        |
| Textured surface                                           | 92 (18.5)               | 77 (11.6)          | 169 (14.6)        |
| Missing                                                    | 64 (12.9)               | 53 (8.0)           | 117 (10.1)        |
| <b>Injuries suffered, n (%)<sup>a</sup></b>                |                         |                    |                   |
| None                                                       | 419 (84.3)              | 582 (87.9)         | 1001 (86.4)       |
| Superficial wound                                          | 12 (2.4)                | 17 (2.6)           | 29 (2.5)          |
| Broken bone                                                | 0 (0.0)                 | 0 (0.0)            | 0 (0.0)           |
| Pulled muscle/sprained ligament                            | 10 (2.0)                | 12 (1.8)           | 22 (1.9)          |
| Other                                                      | 5 (1.0)                 | 3 (0.5)            | 8 (0.7)           |
| Missing                                                    | 52 (10.5)               | 49 (7.4)           | 101 (8.7)         |

<sup>a</sup> not mutually exclusive

SD, standard deviation; max, maximum; min, minimum; n, number; %, percentage
